# Supplementary material for: Inside the brush: partition by molecular weight in grafting to reactions from melt
Source: Royal Society of Chemistry journal article supplement (doi:10.1039/d1py01303c), 2021-01-01
Supplement: d1py01303c1.pdf [file d1py01303c1.pdf]

## Supporting Info

### Inside the Brush: Partition by Molecular Weight in Grafting to Reactions from Melt

Diego Antoniolia, Riccardo Chiarcosa,<sup>b</sup> Valentina Gianottia, Margherita Terragnoa, Michele Lausa, Gianmarco Munaòc, Giuseppe Milanod, Antonio De Nicolae, Michele Peregob

<sup>a</sup> Dipartimento di Scienze e Innovazione Tecnologica (DISIT), Università del Piemonte Orientale “A. Avogadro”, Viale T. Michel 11, 15121 Alessandria, Italy.

<sup>b</sup> CNR-IMM, Unit of Agrate Brianza, Via C. Olivetti 2, 20864 Agrate Brianza, Italy.

<sup>c</sup> Dipartimento di Scienze Matematiche e Informatiche, Scienze Fisiche e Scienze della Terra, Università degli Studi di Messina, Viale F. Stagno d’Alcontres 31, 98166 Messina, Italy.

<sup>d</sup> Department of Chemical, Materials and Production Engineering, University of Naples Federico II, Naples 80125, Italy

<sup>e</sup> Dipartimento di Chimica e Biologia “A. Zambelli”, Università degli Studi di Salerno, via G. Paolo II 134, 84084, Fisciano (SA), Italy.

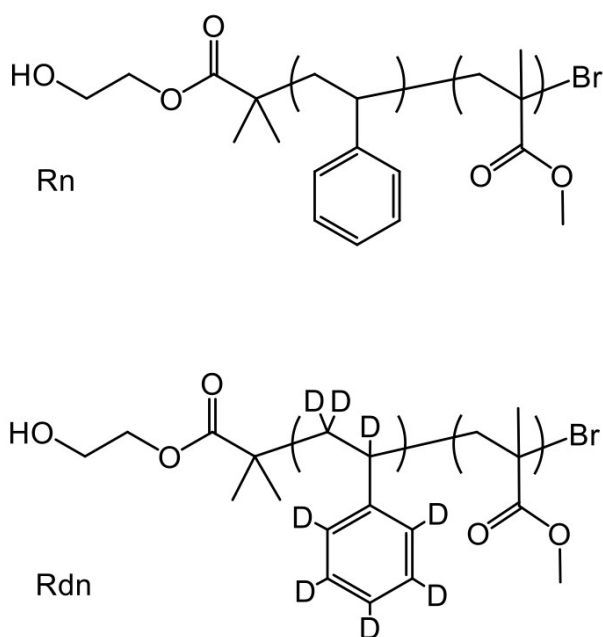

**Figure 1S.** Structures of the hydroxy terminated poly(styrene-*r*-methyl methacrylate) (Rn) and partly deuterated hydroxy terminated poly(styrene d<sub>8</sub>-*r*-methyl methacrylate) random copolymers (Rdn).

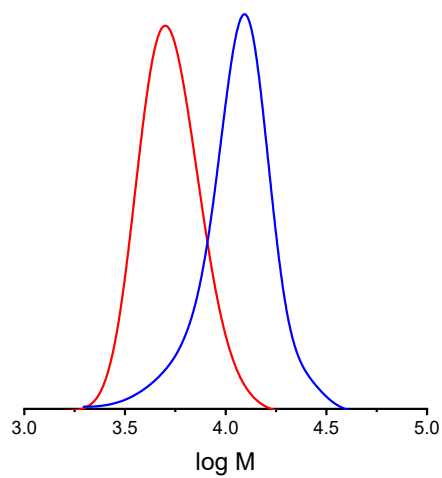

**Figure 2S.** SEC Curves of samples R5.4 (blue) and Rd11.2 (red).

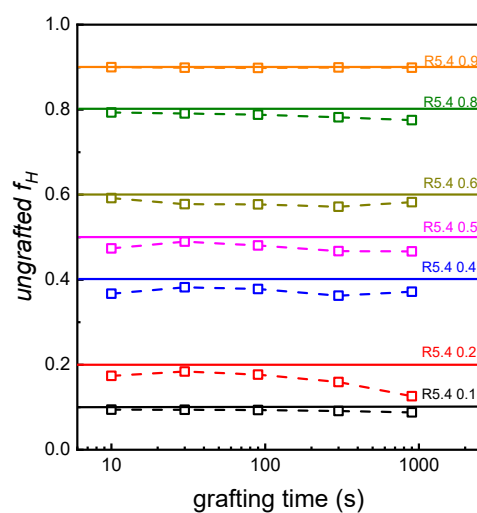

**Figure 3S.** Molar fraction  $f_H$  of R5.4 in the layer of unreacted chains during the grafting process of all the blends as a function of time. The continuous lines indicates the starting compositions of the various blends.

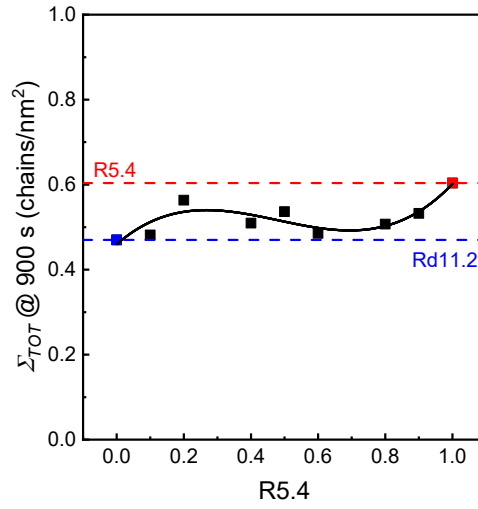

**Figure 4S.** Total grafting density of the brush layer for different blends reported as a function of the molar fraction of R5.4 after 900 s grafting time for blends grafted at 250°C.

#### Grafting densities calculation.

The molar fraction of deuterated styrene on the total styrene amount in a grafted brush is named  $f$  and is obtained using the Equation S1.

$$f = \frac{1.05 A_{STY-d8}}{1.05 A_{STY-d8} + A_{STY}} \quad (S1)$$

$A_{STY-d8}$  and  $A_{STY}$  are the chromatographic peak integrals relative to deuterated and hydrogenated styrene respectively, obtained by TGA-GC-MS analysis. The values of  $A_{STY-d8}$  and  $A_{STY}$  are proportional to the number of deuterated and hydrogenated monomers generated and detected during the analysis. The factor of 1.05 is a numerical correction to account for the different mass response factor of the monomers.

The grafting densities of deuterated and hydrogenated chains, indicated respectively as  $\Sigma_D$  and  $\Sigma_H$ , are calculated using Equation S2 and S3.

$$\Sigma_D = \frac{f H d N_A}{M_n^D} \quad (S2)$$

$$\Sigma_H = \frac{(1 - f) H d N_A}{M_n^H} \quad (S3)$$

In the equations,  $H$  is the thickness of the grafted brush,  $f$  is the deuterated styrene fraction defined in Eq. S1,  $d$  is the density of the random copolymer brush and  $M_n^D$  ( $M_n^H$ ) is the number average molecular weight of the deuterated (hydrogenated) polymer.

The total grafting density ( $\Sigma_{Tot}$ ) is simply the sum of  $\Sigma_D$  and  $\Sigma_H$ .
